# Supplementary material for: Global Patterns of Evolutionary Distinct and Globally Endangered Amphibians and Mammals
Source: PubMed Central journal article supplement (PMC3655148; doi:10.1371/journal.pone.0063582), 2013-05-15

# Mammalian top 5% ED species

Resolution 25 X 25 km

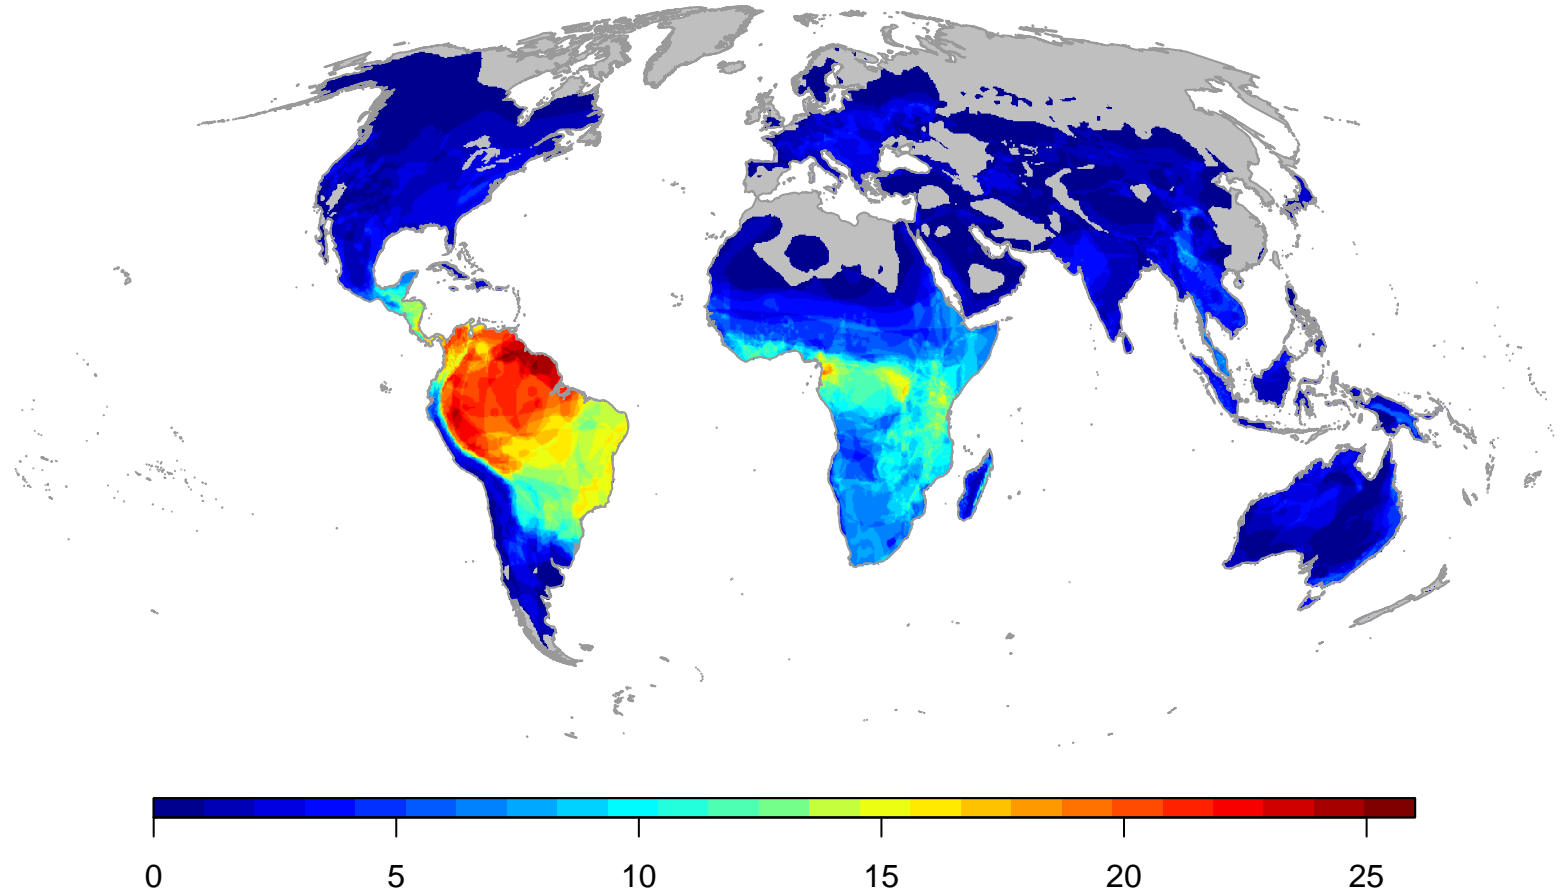

# Mammalian top 5% EDGE species

Resolution 25 X 25 km

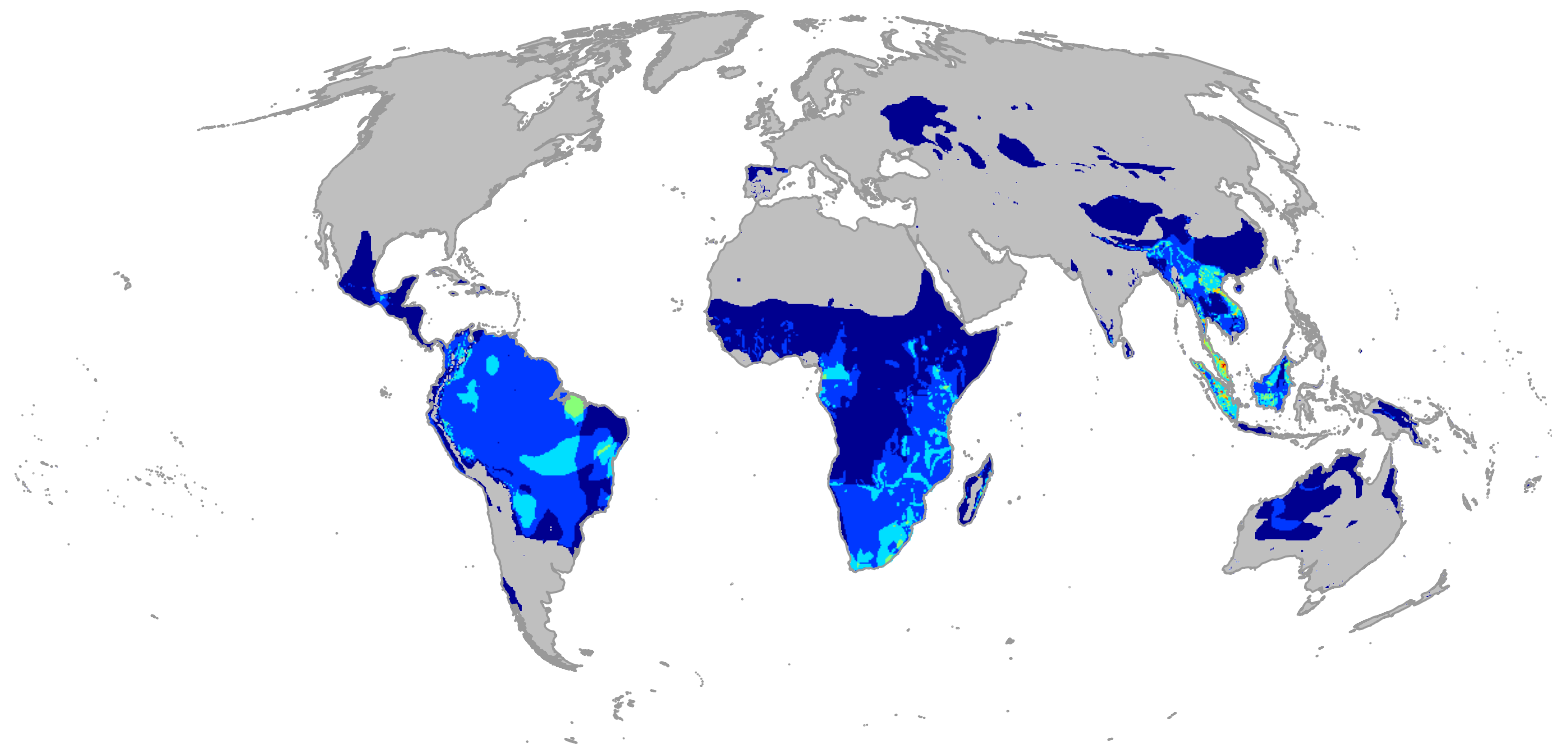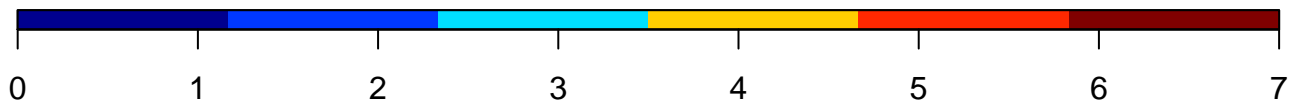

# Mammalian top 5% ED species

Resolution 50 X 50 km

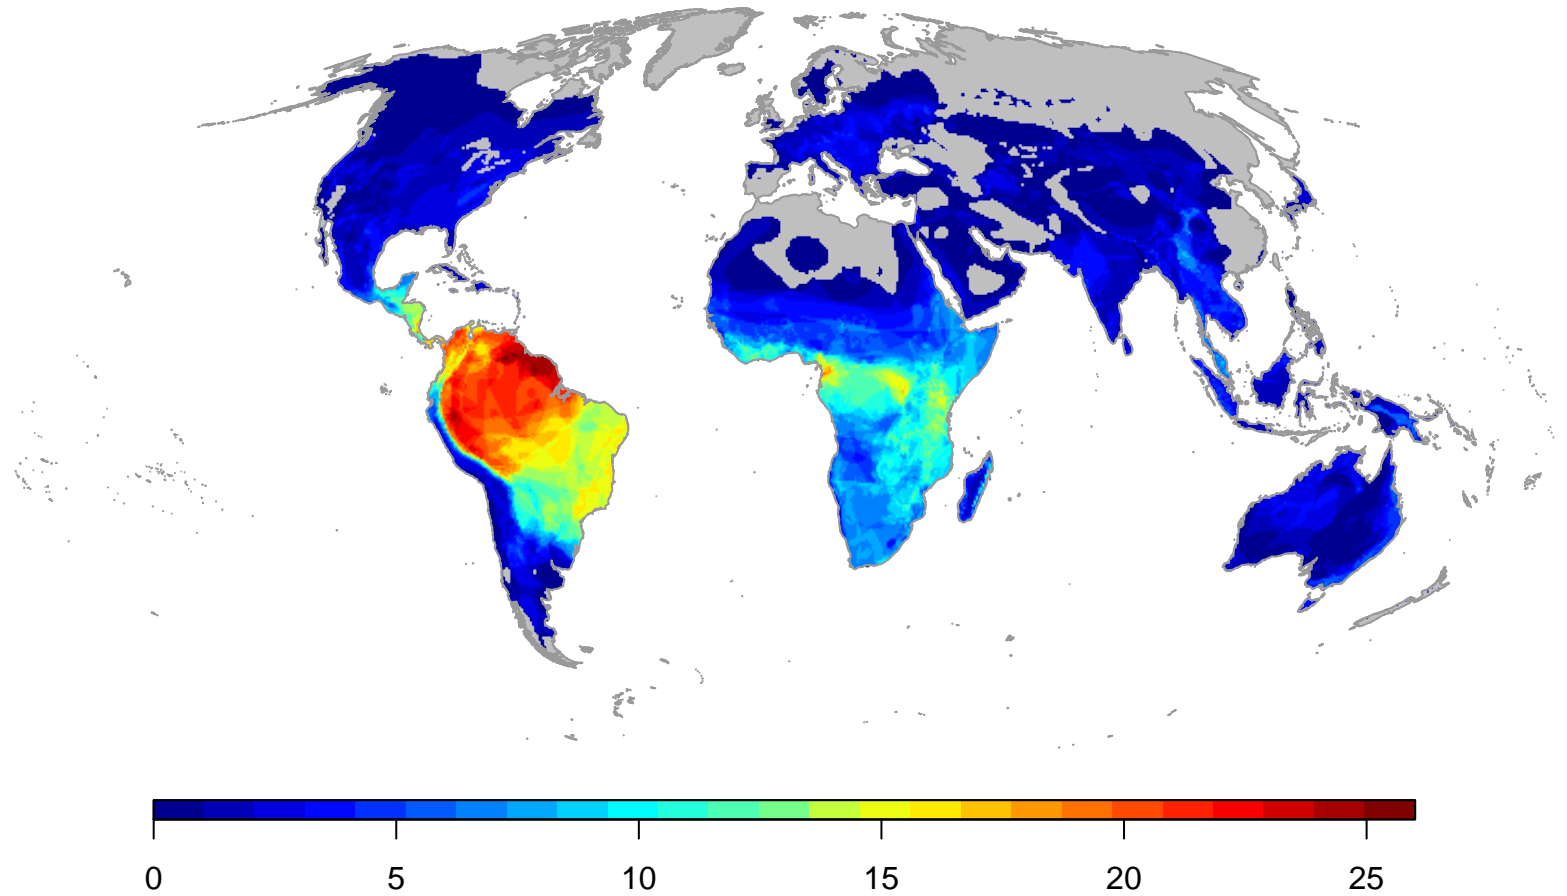

# Mammalian top 5% EDGE species

Resolution 50 X 50 km

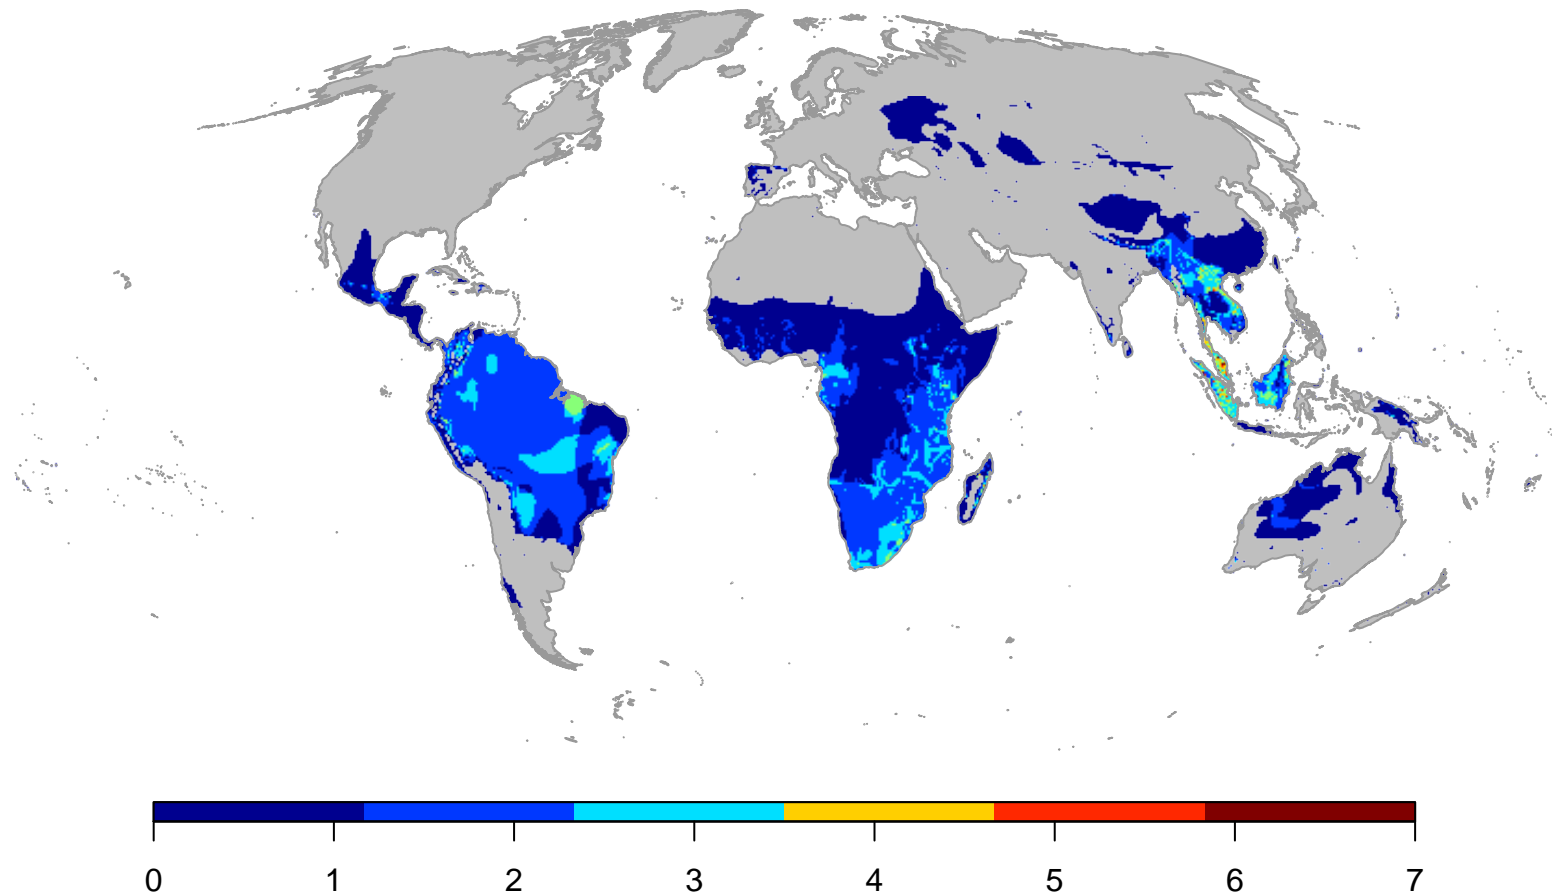

# Mammalian top 5% ED species

Resolution 75 X 75 km

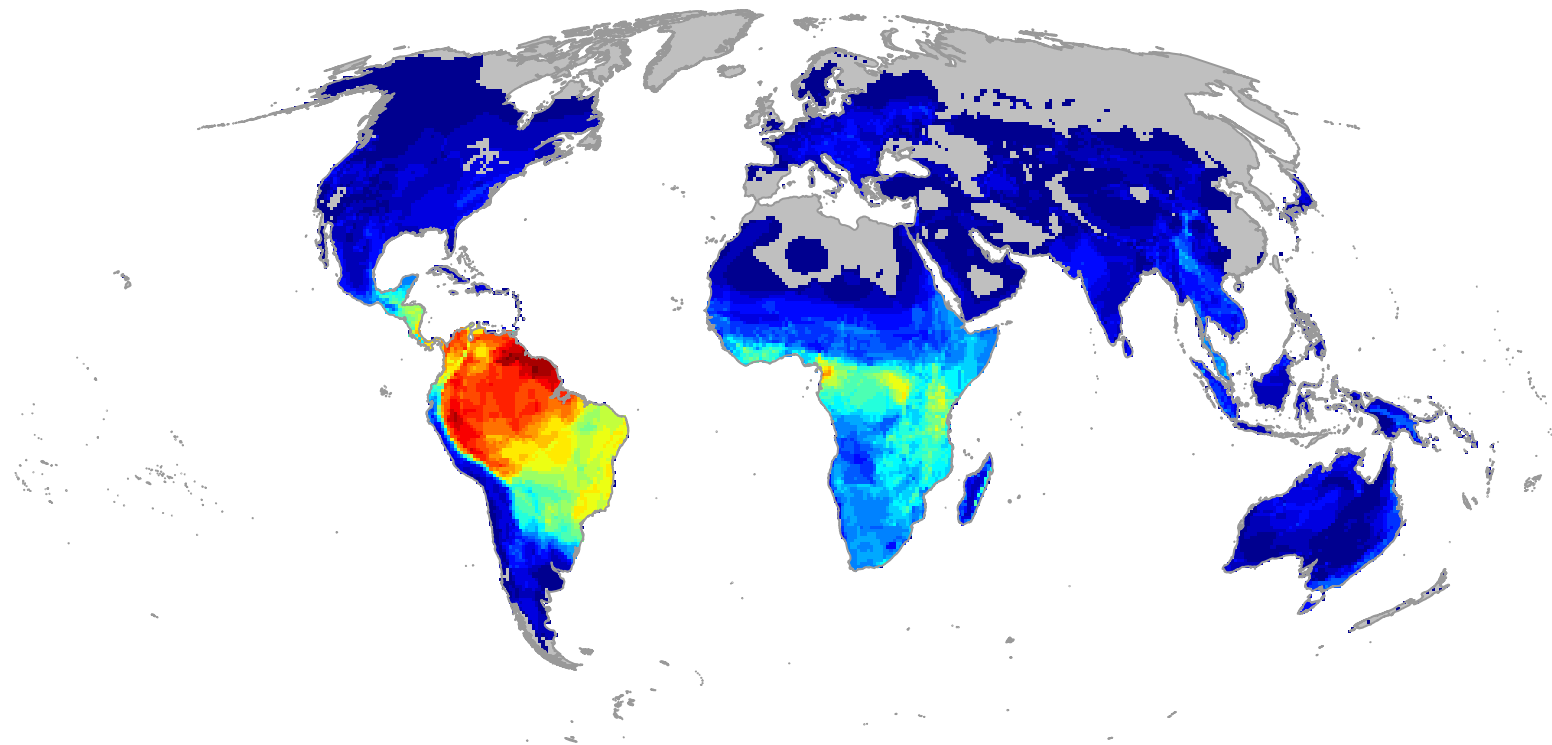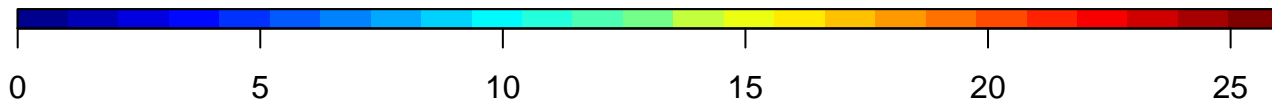

# Mammalian top 5% EDGE species

Resolution 75 X 75 km

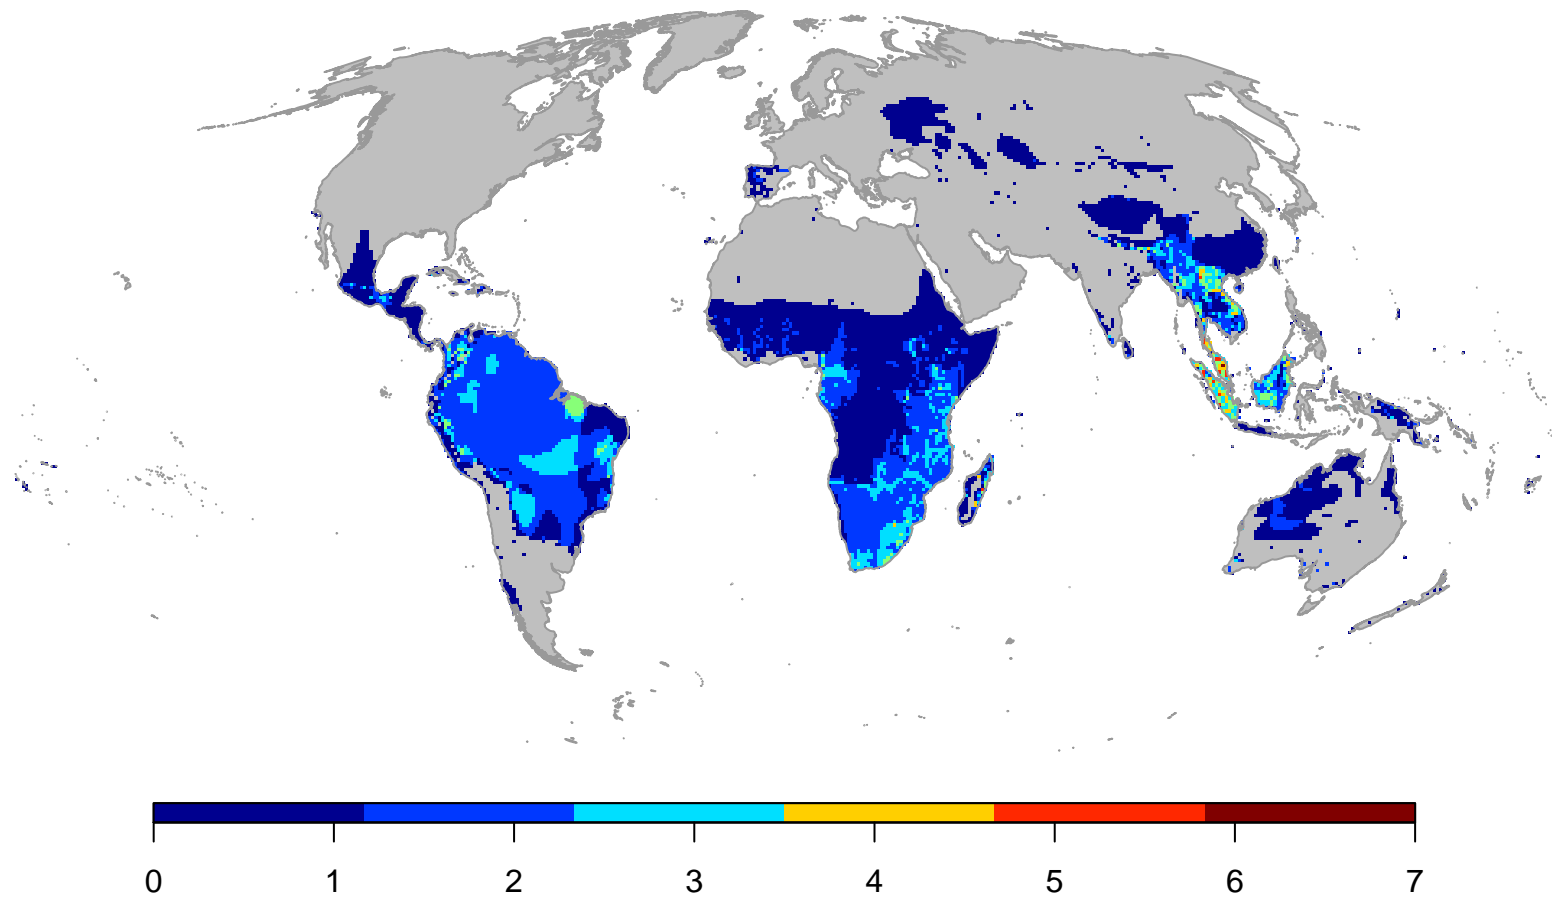

# Mammalian top 5% ED species

Resolution 100 X 100 km

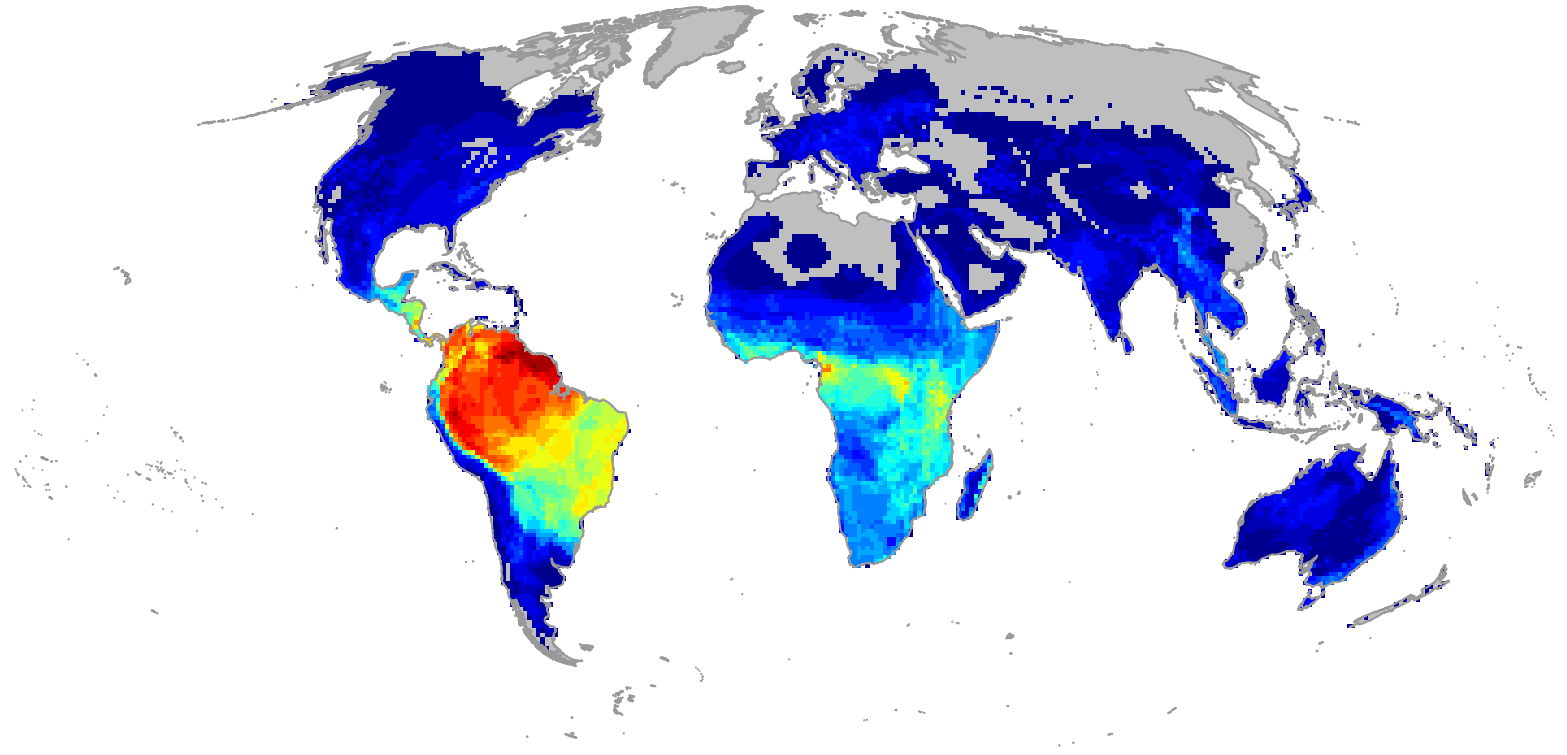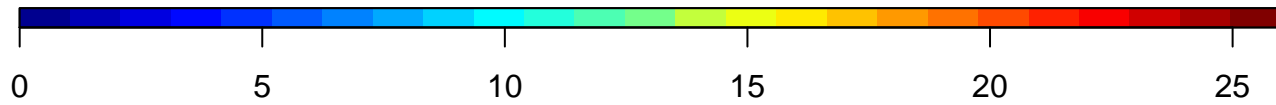

# Mammalian top 5% EDGE species

Resolution 100 X 100 km

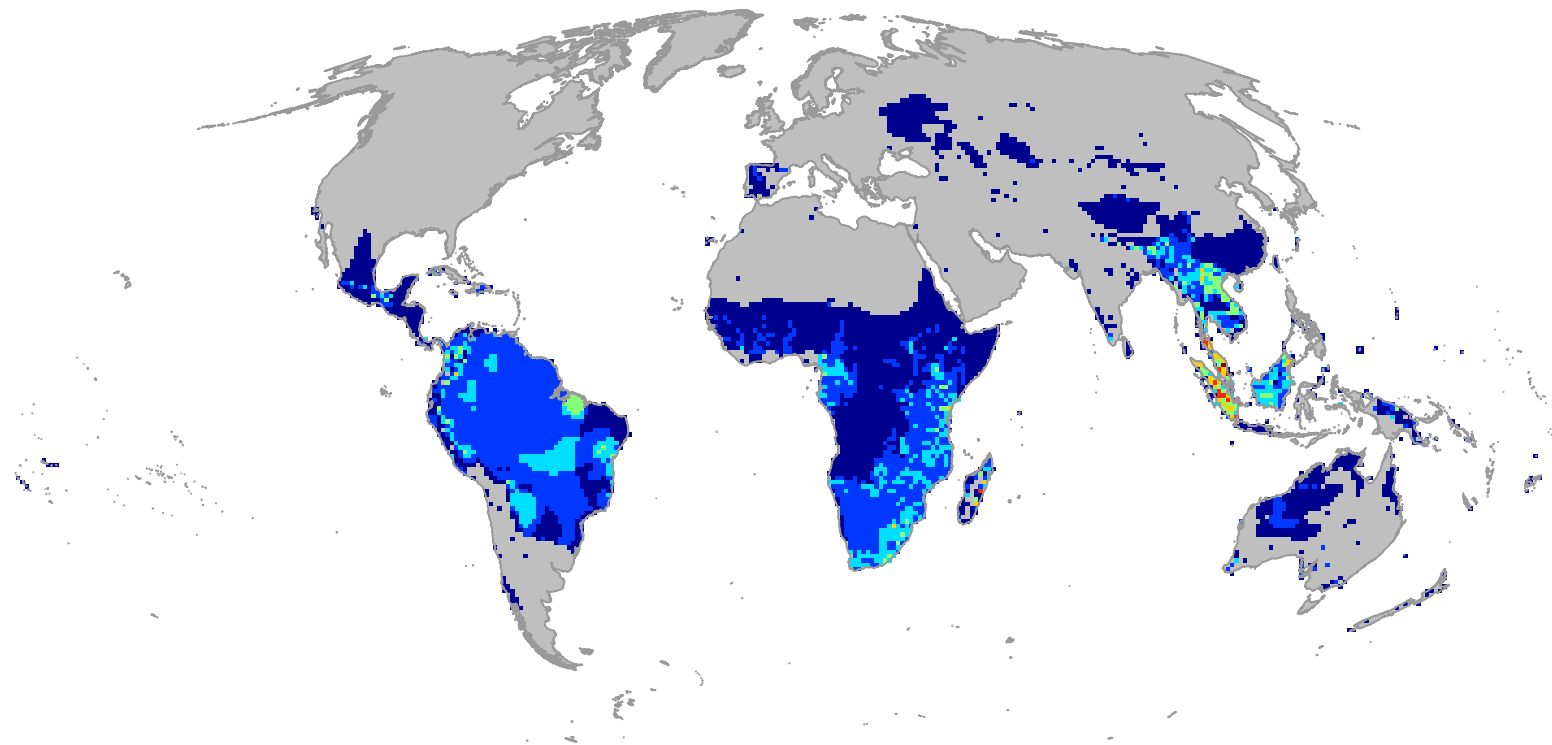



# Mammalian top 5% ED species

Resolution 125 X 125 km

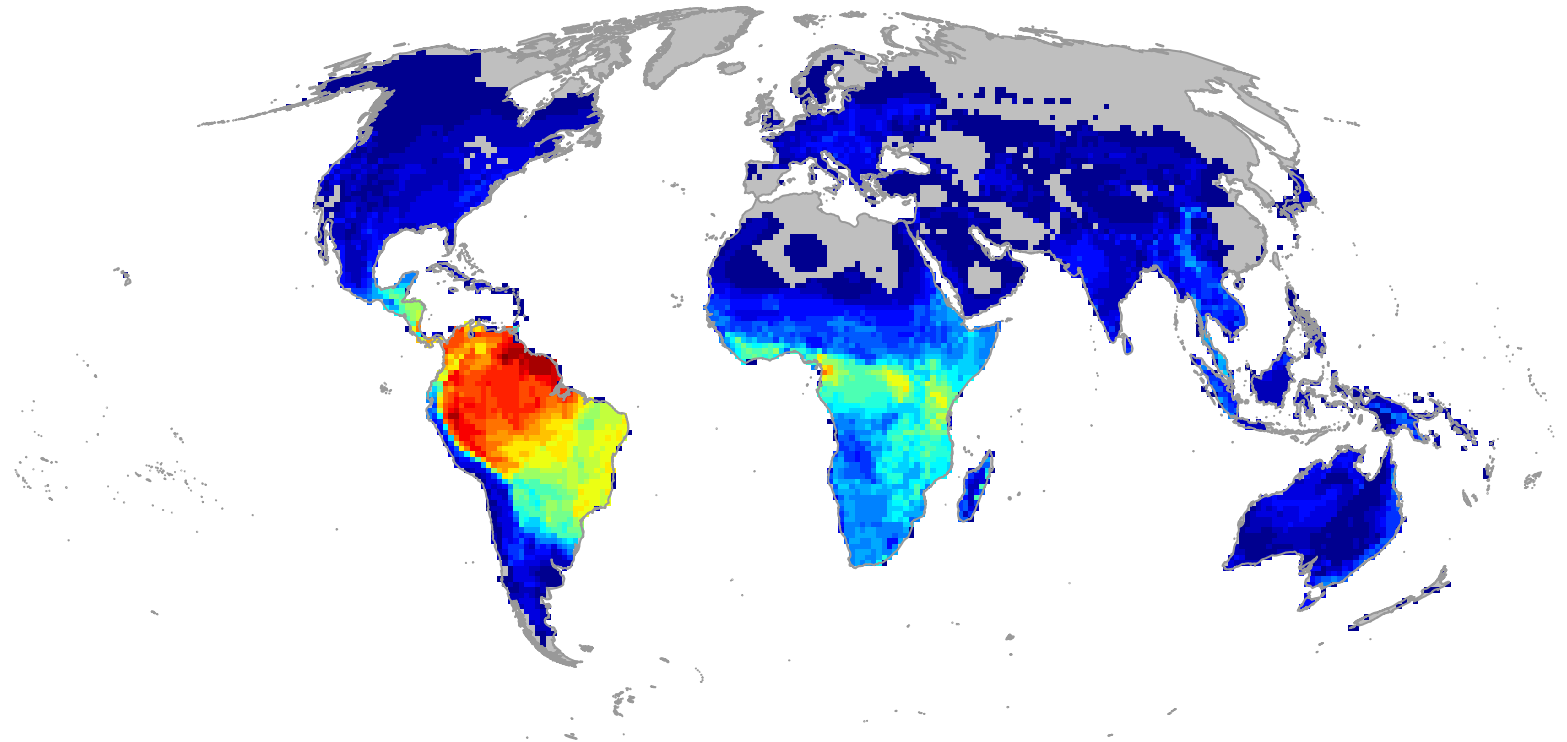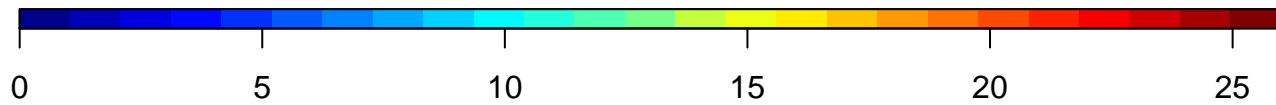

# Mammalian top 5% EDGE species

Resolution 125 X 125 km

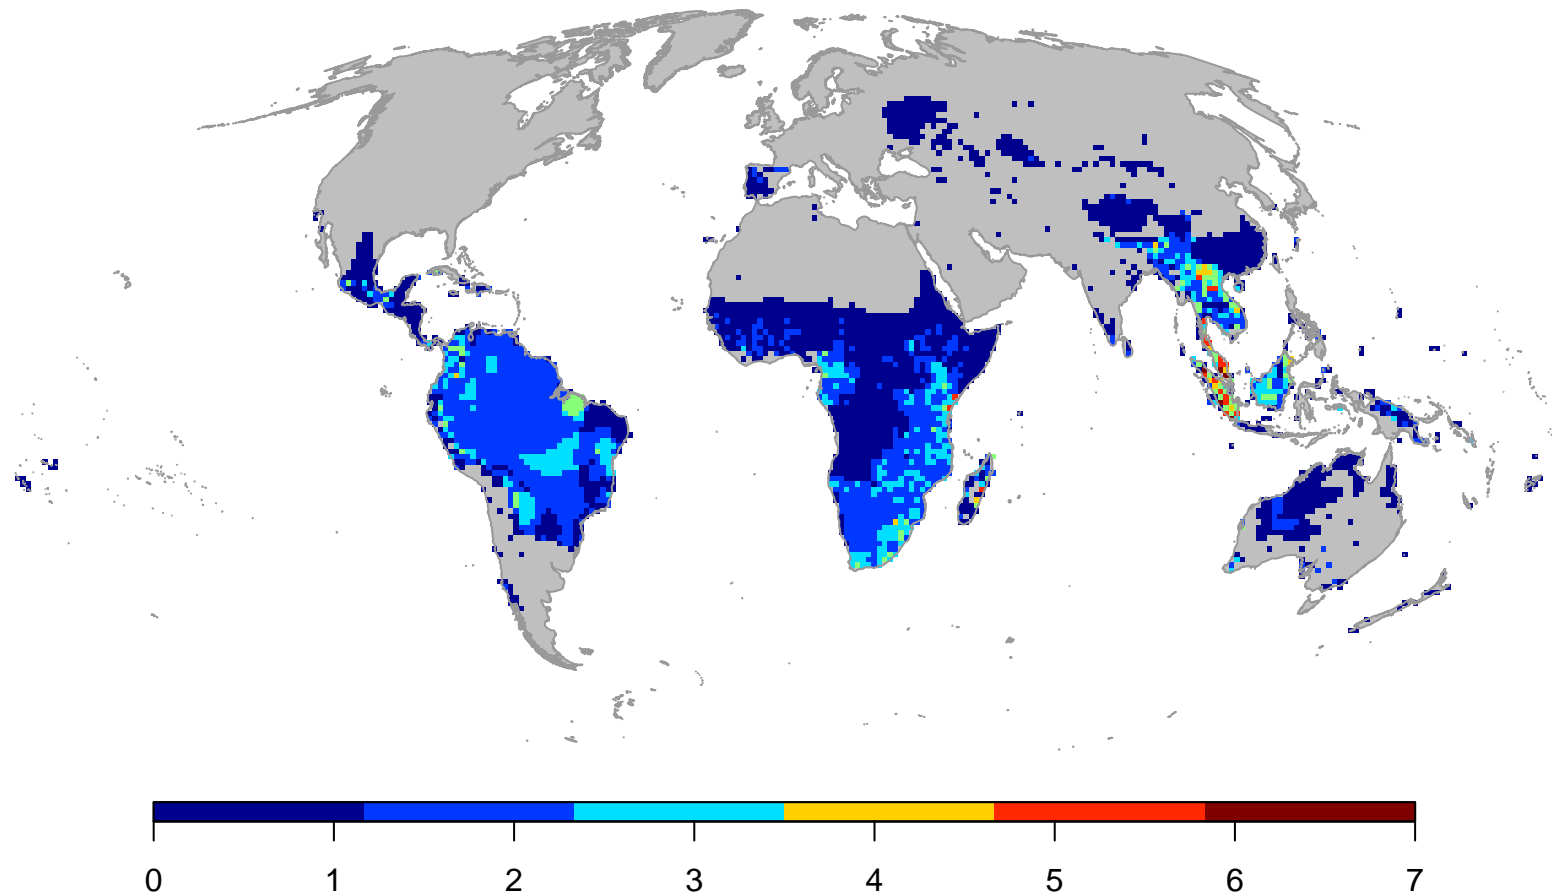

# Mammalian top 5% ED species

Resolution 150 X 150 km

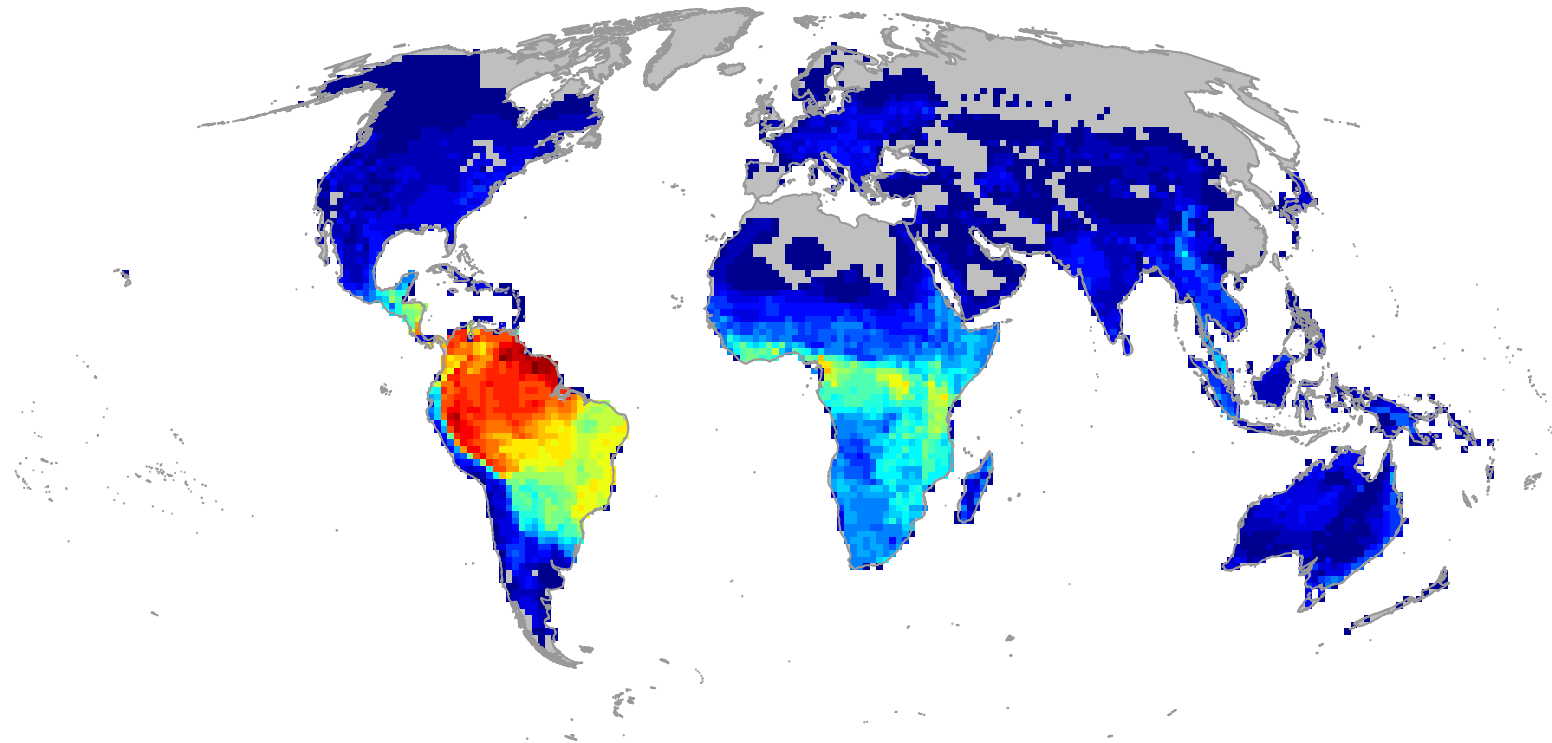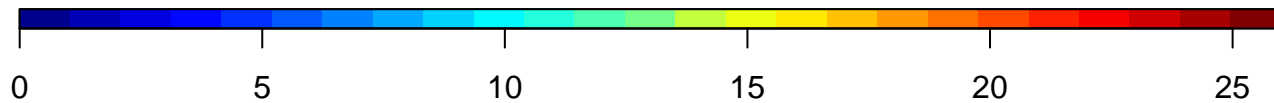

# Mammalian top 5% EDGE species

Resolution 150 X 150 km

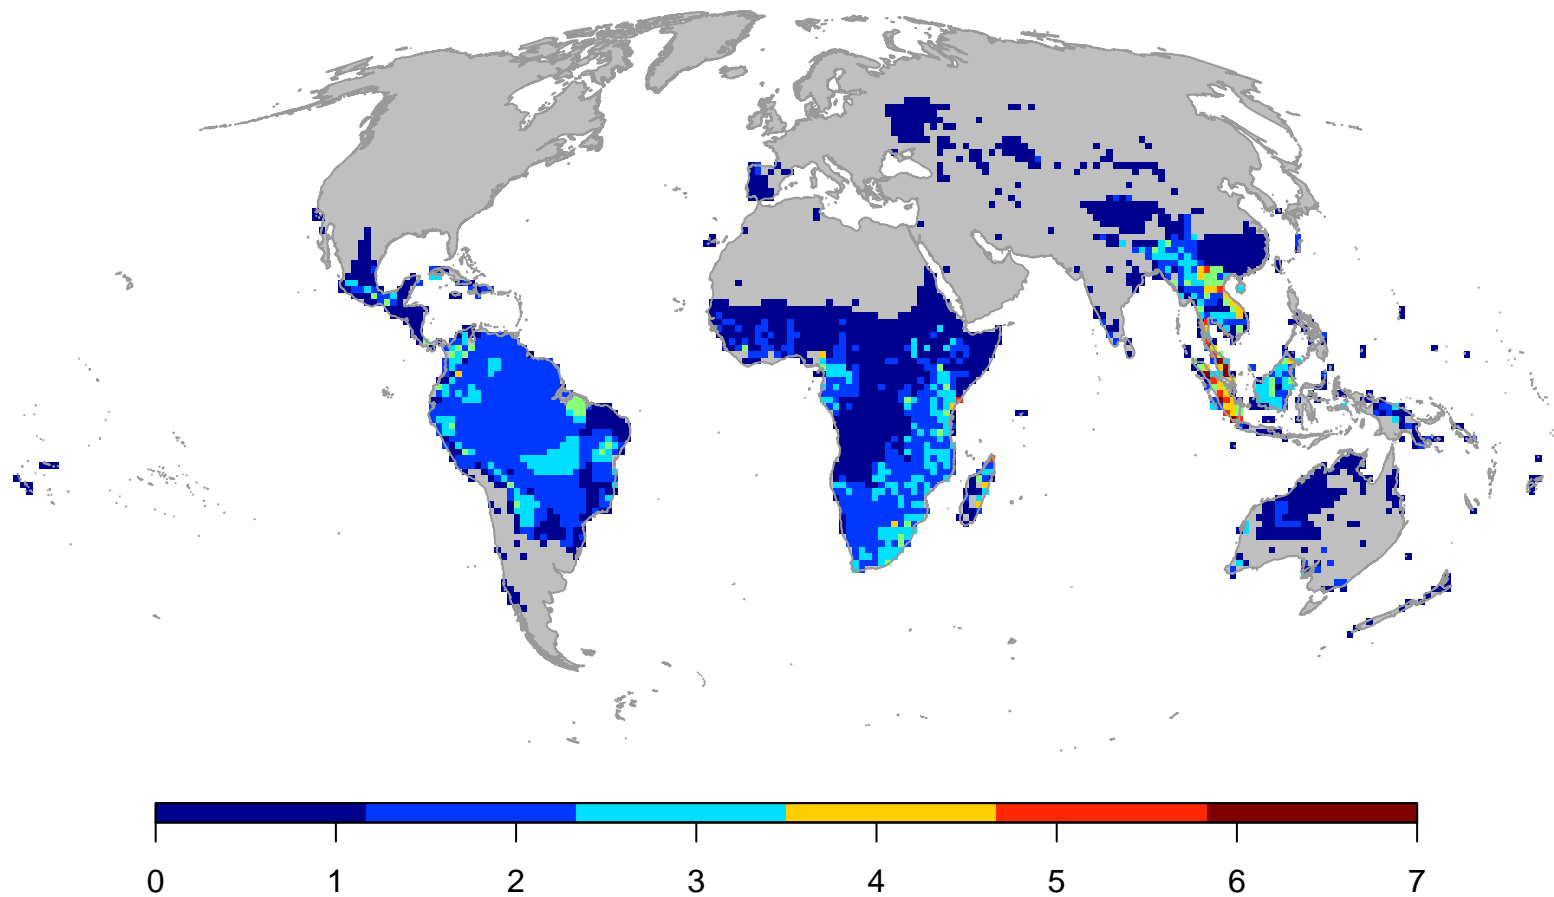

# Mammalian top 5% ED species

Resolution 175 X 175 km

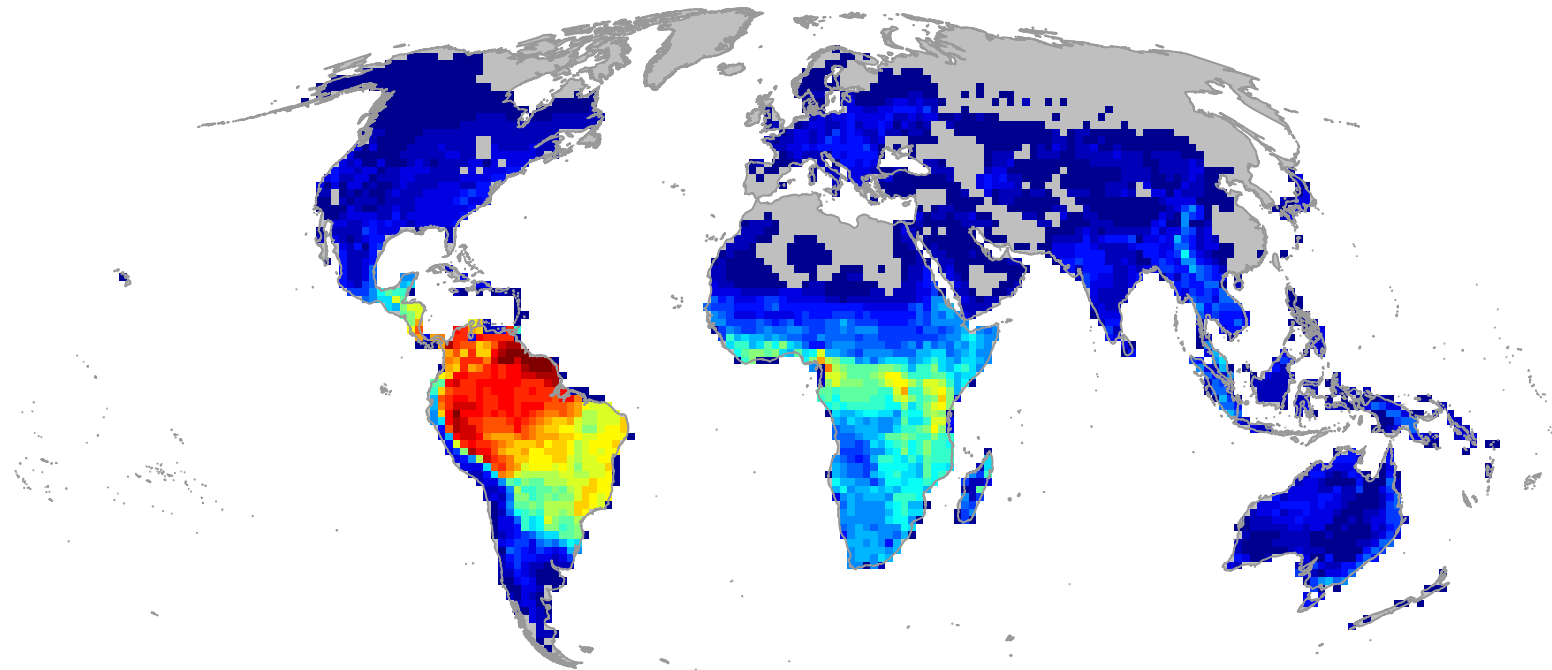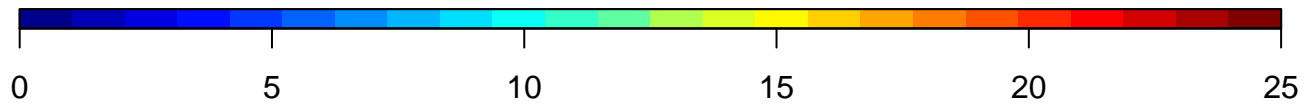

# Mammalian top 5% EDGE species

Resolution 175 X 175 km

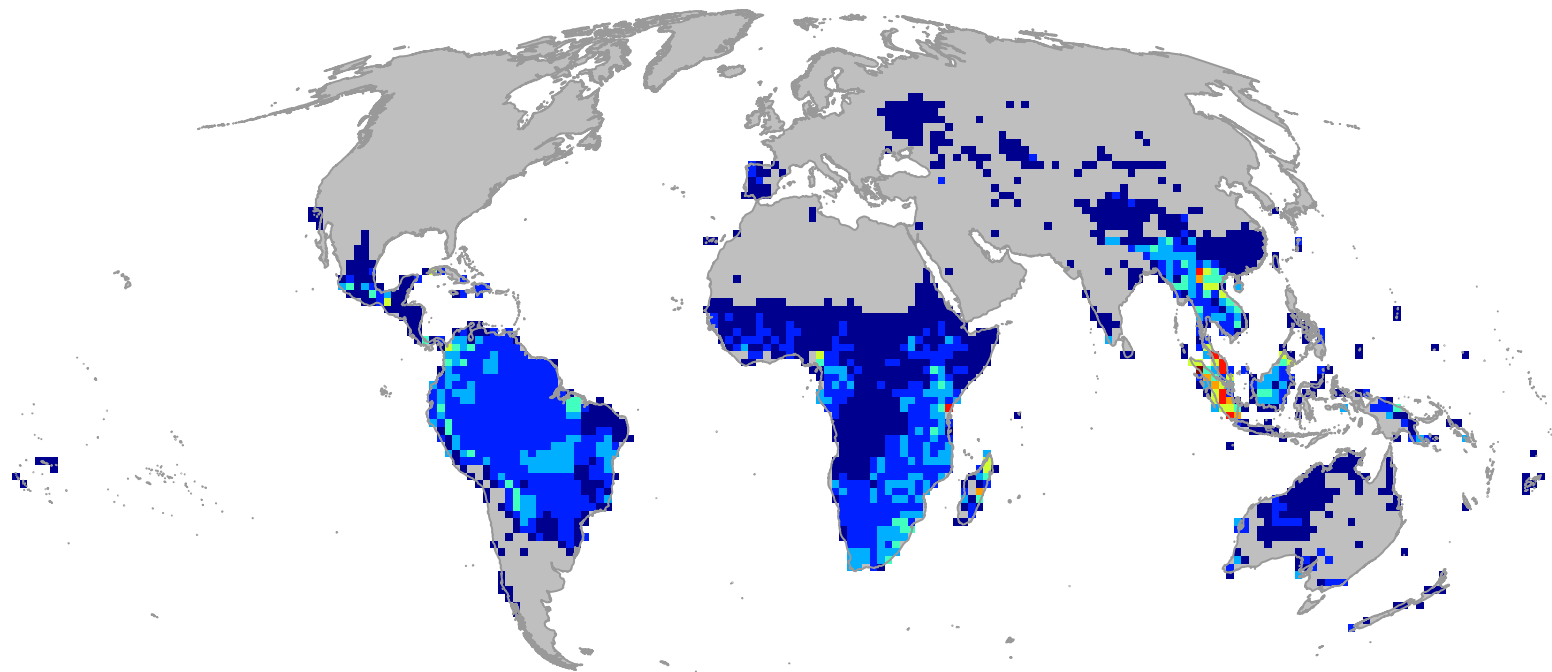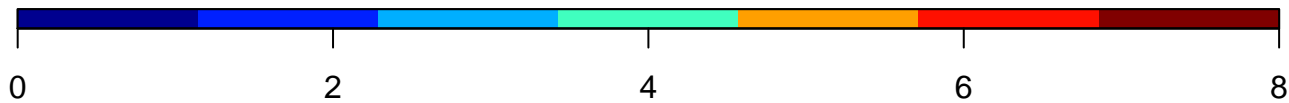

# Mammalian top 5% ED species

Resolution 200 X 200 km

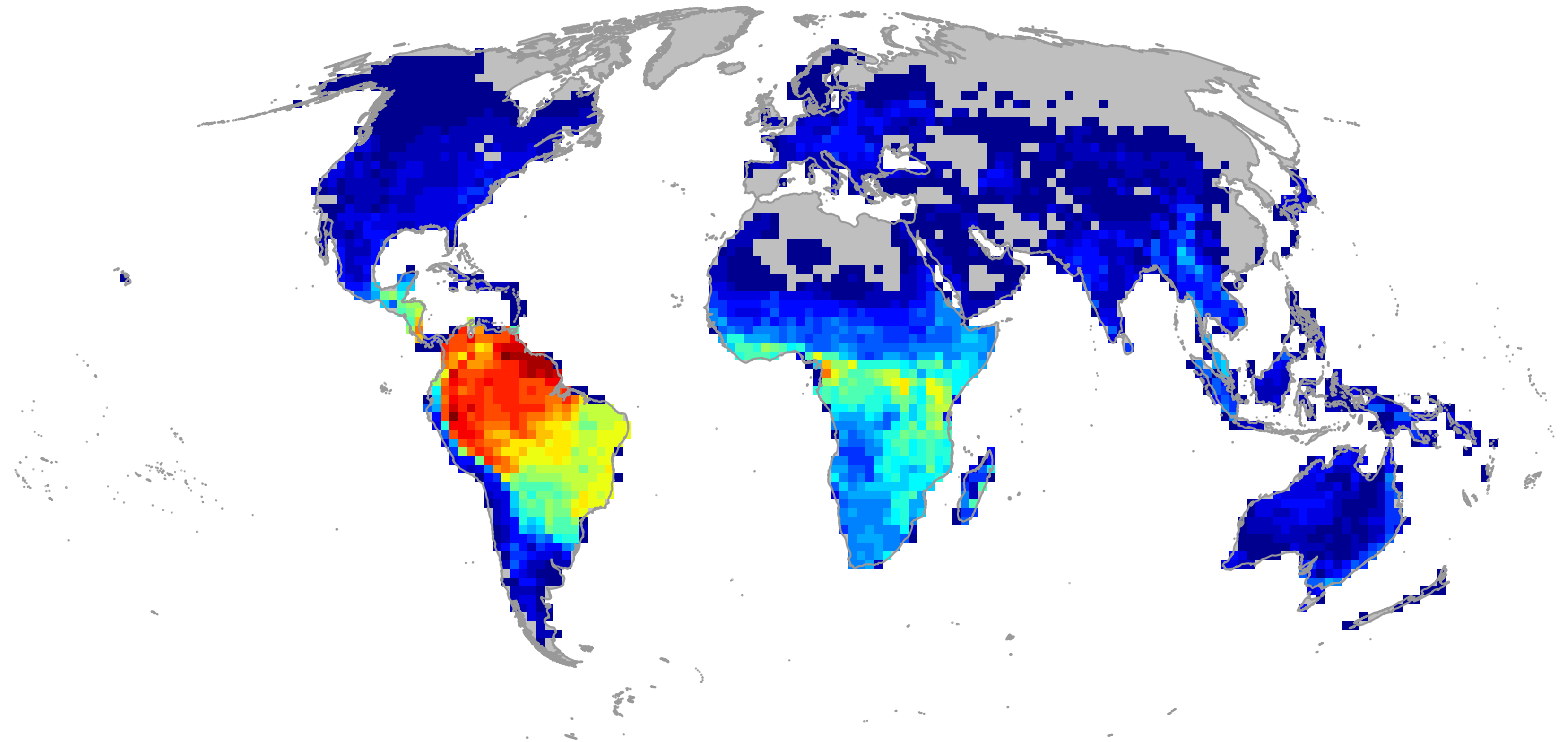

# Mammalian top 5% EDGE species

Resolution 200 X 200 km

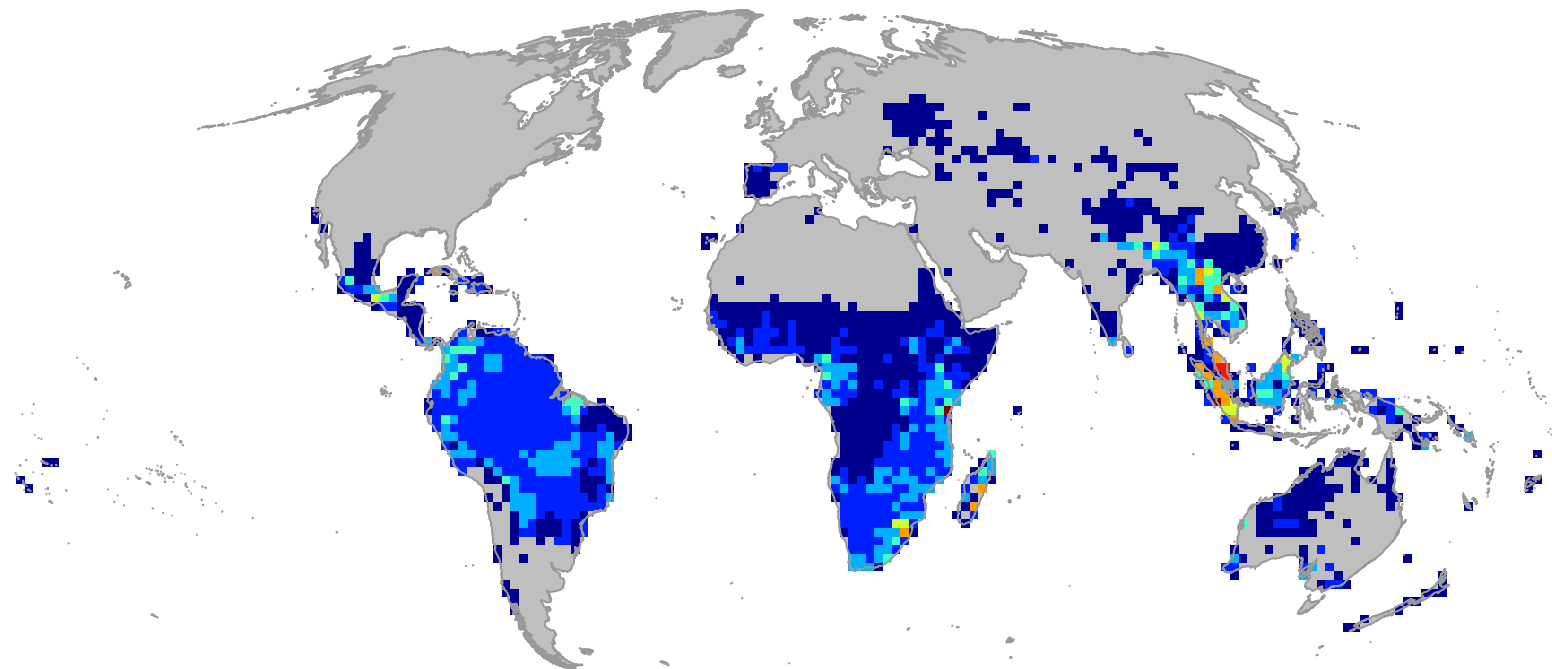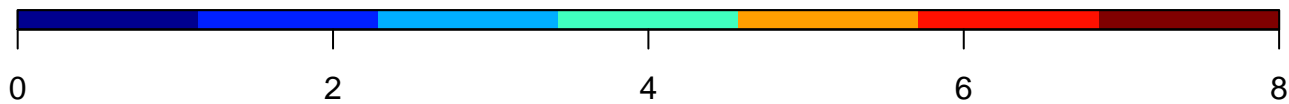

Supplement: pone.0063582.s007.pdf [file pone.0063582.s007.pdf]
