# Supplementary material for: Global Patterns of Evolutionary Distinct and Globally Endangered Amphibians and Mammals
Source: PubMed Central journal article supplement (PMC3655148; doi:10.1371/journal.pone.0063582), 2013-05-15
Supplement: pone.0063582.s008.pdf [file pone.0063582.s008.pdf]

# Amphibian ED dispersion

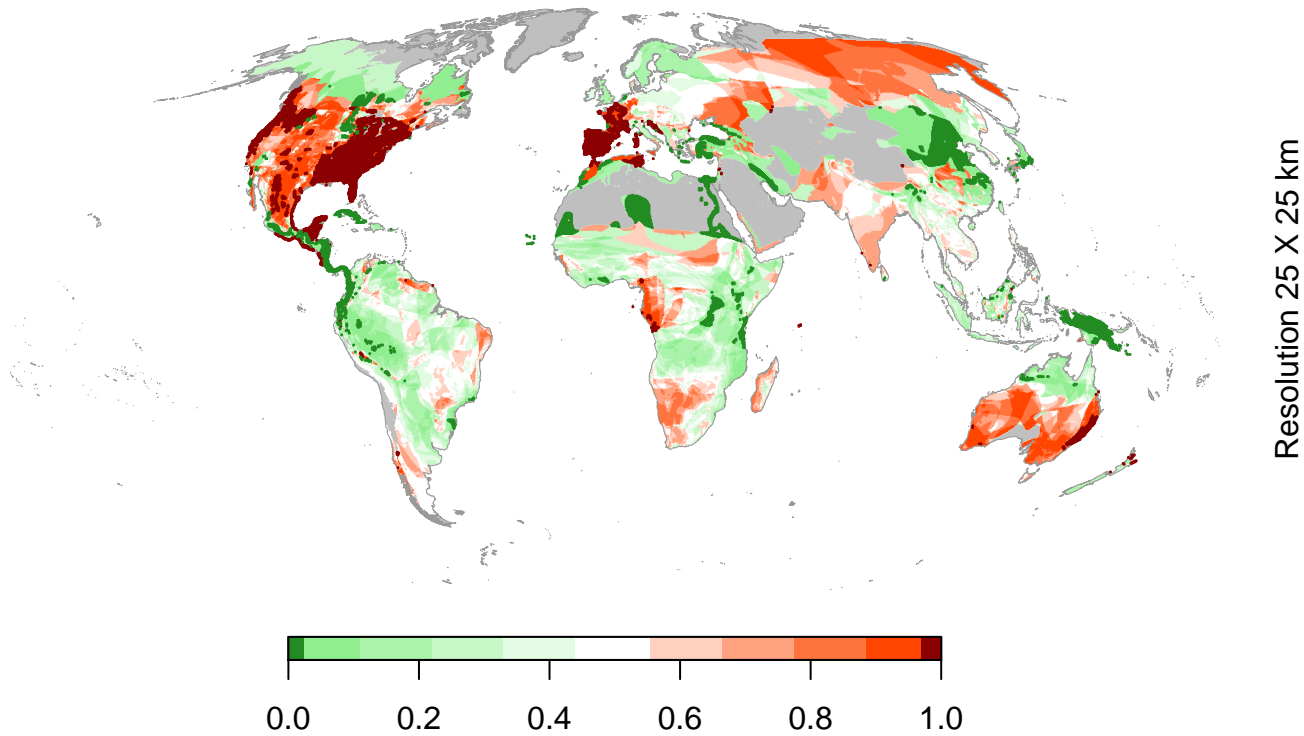

# Amphibian EDGE dispersion

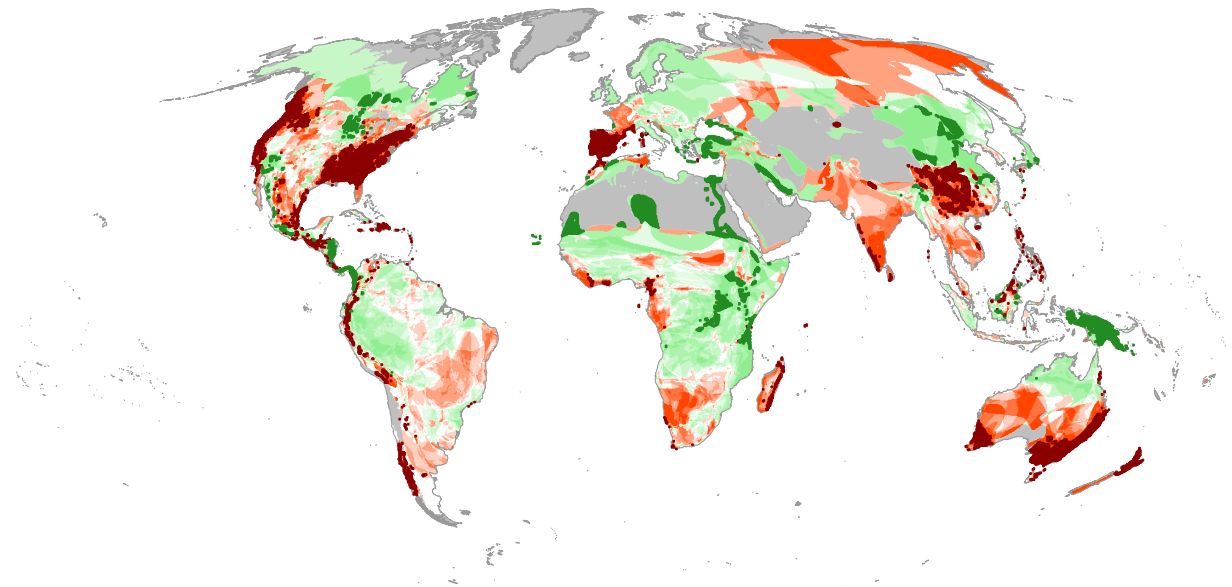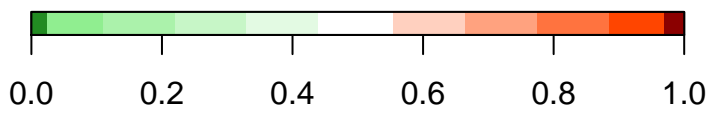

Resolution 25 X 25 km

# Amphibian ED dispersion

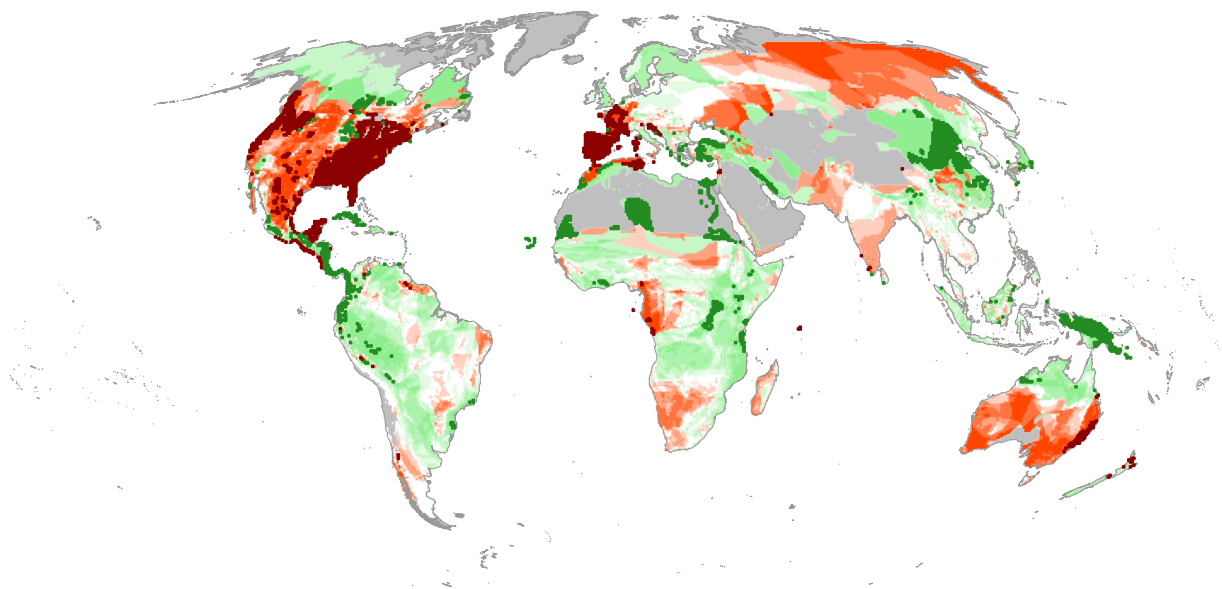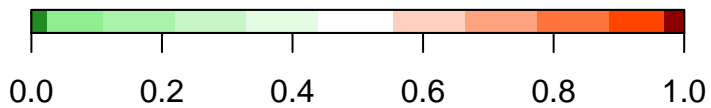

Resolution 50 X 50 km

# Amphibian EDGE dispersion

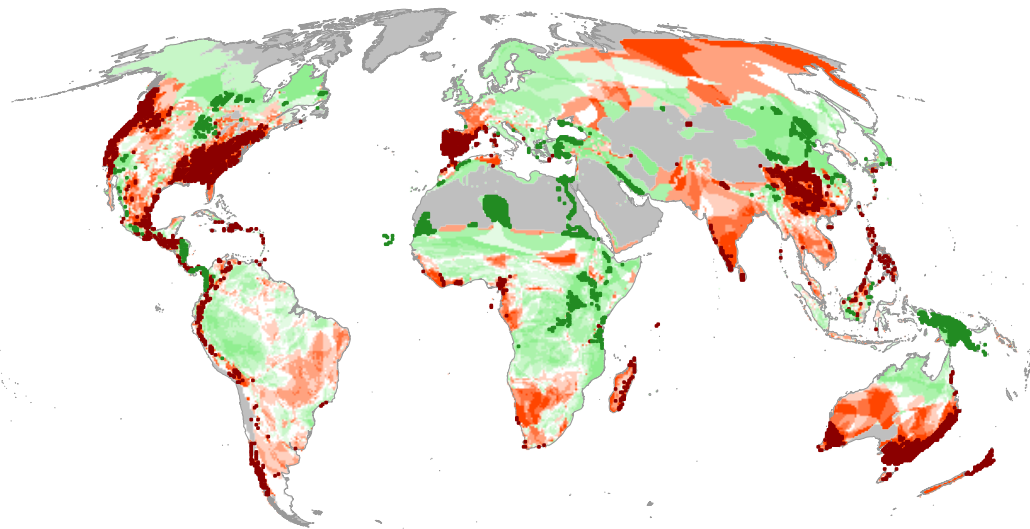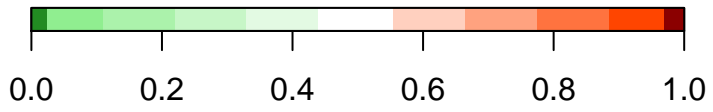

Resolution 50 X 50 km

# Amphibian ED dispersion

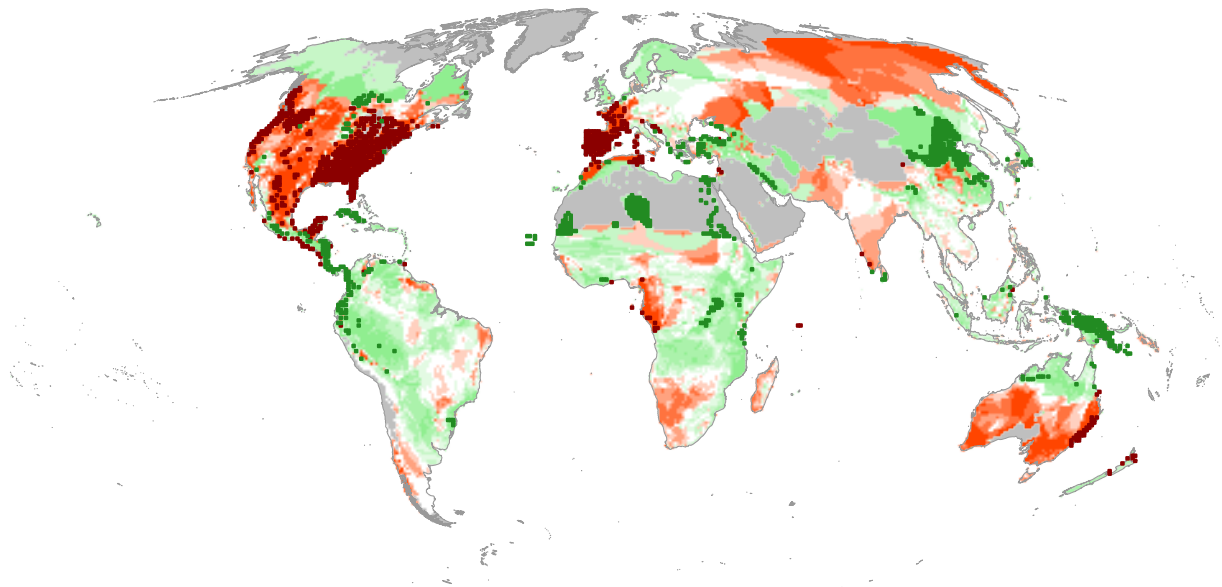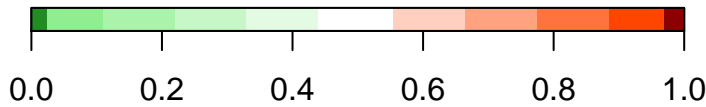

Resolution 75 X 75 km

# Amphibian EDGE dispersion

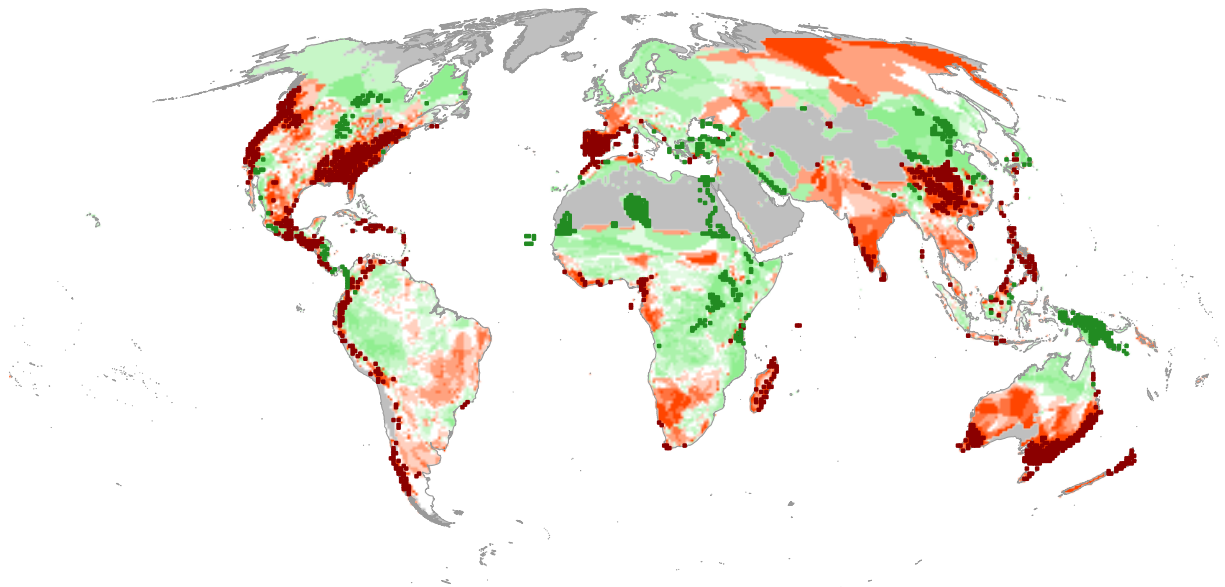

Resolution 75 X 75 km

# Amphibian ED dispersion

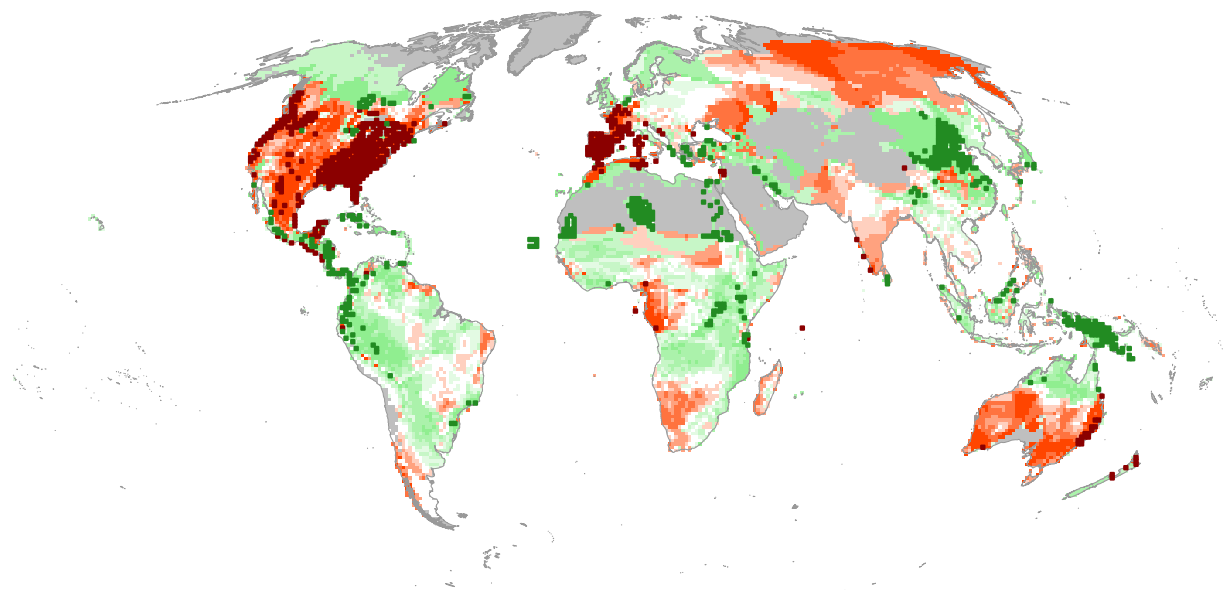

Resolution 100 X 100 km

# Amphibian EDGE dispersion

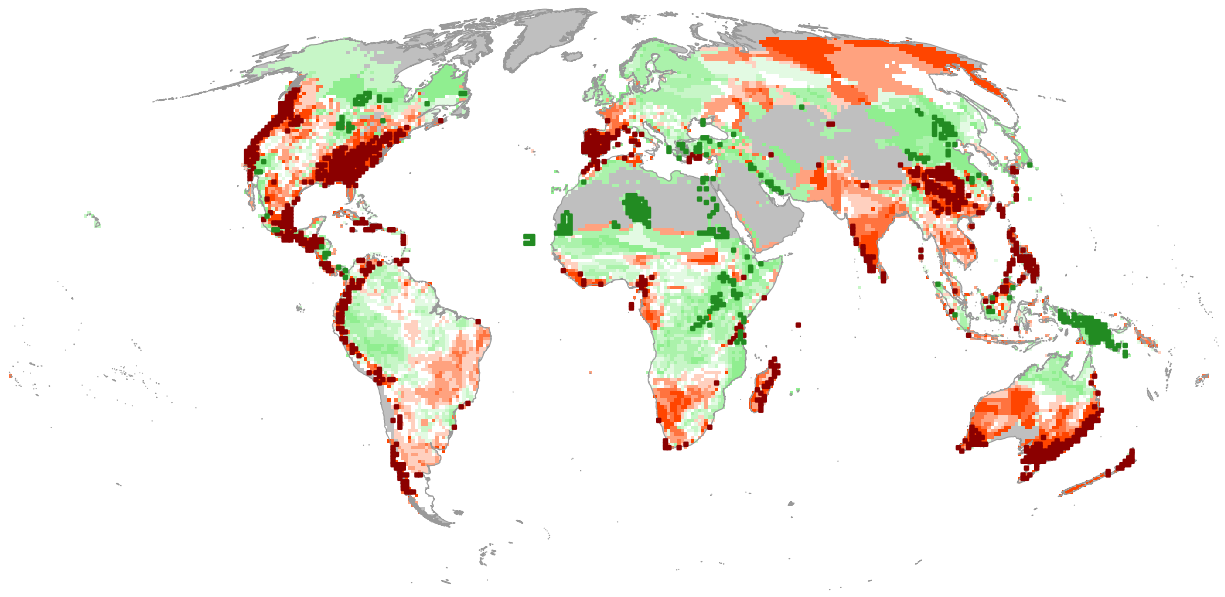

Resolution 100 X 100 km



# Amphibian ED dispersion

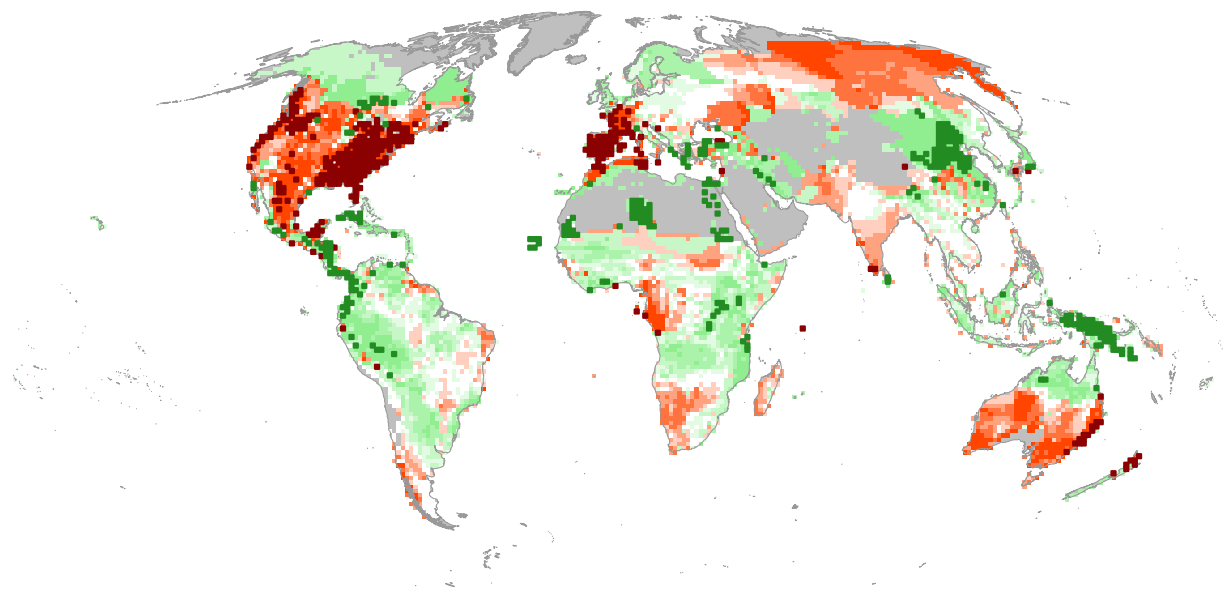

Resolution 125 X 125 km

# Amphibian EDGE dispersion

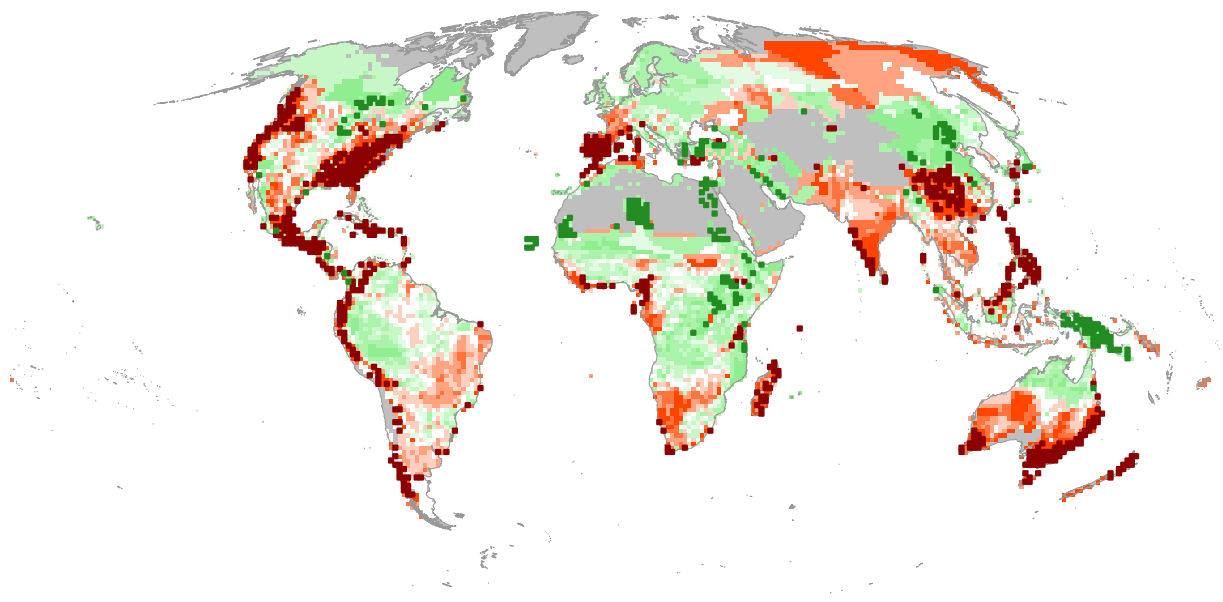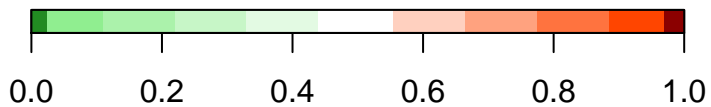

Resolution 125 X 125 km

# Amphibian ED dispersion

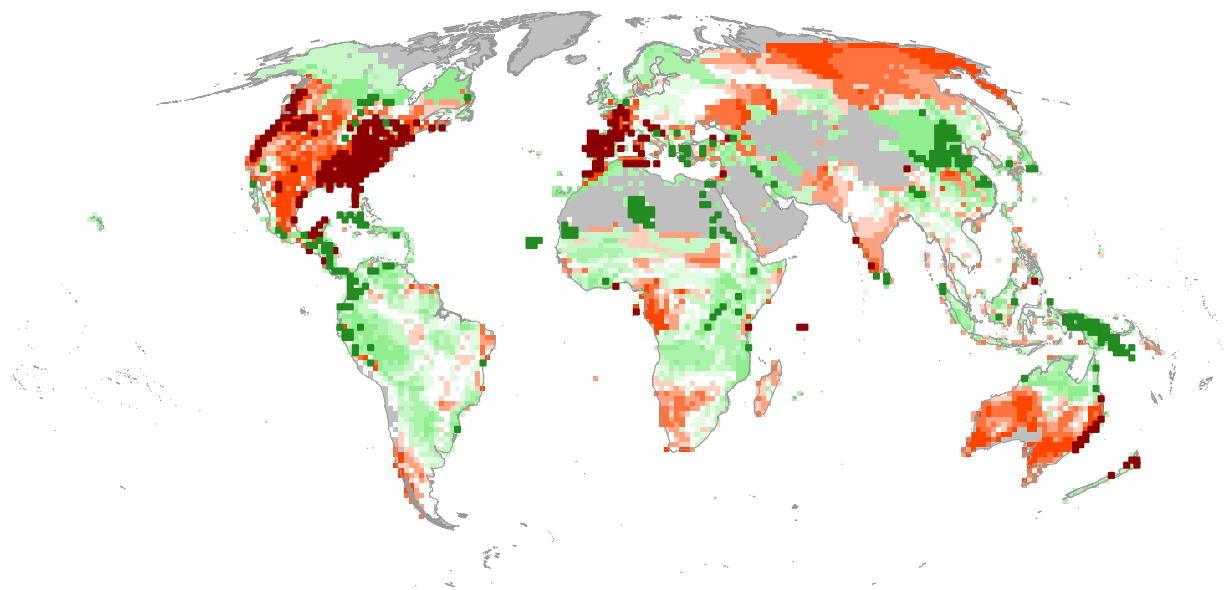

Resolution 150 X 150 km



# Amphibian EDGE dispersion

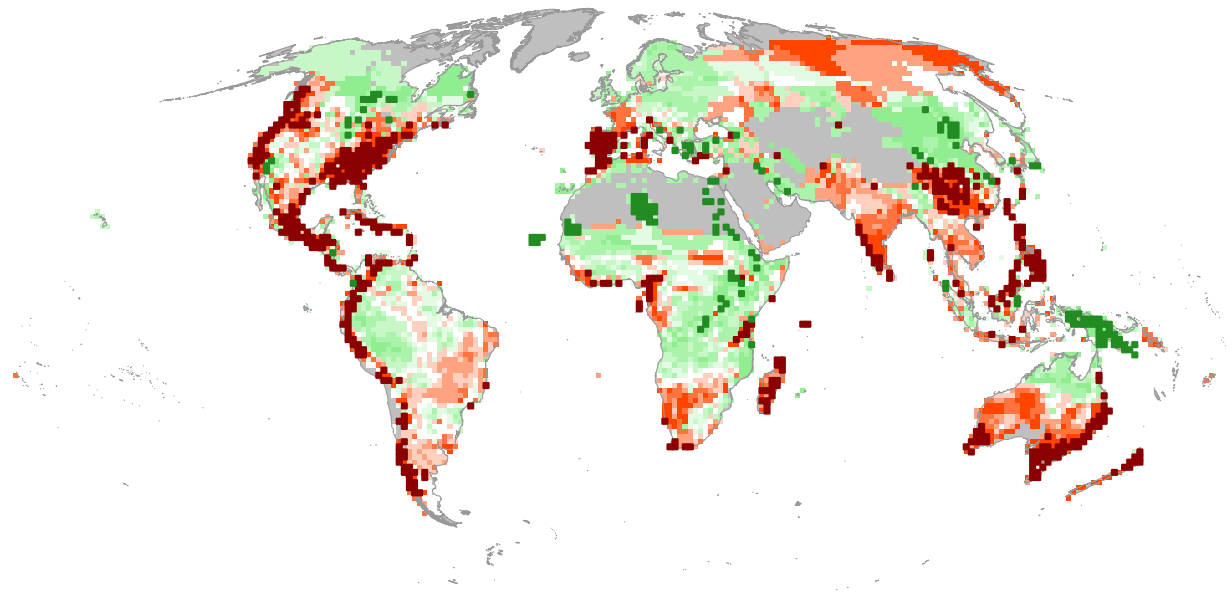

Resolution 150 X 150 km

# Amphibian ED dispersion

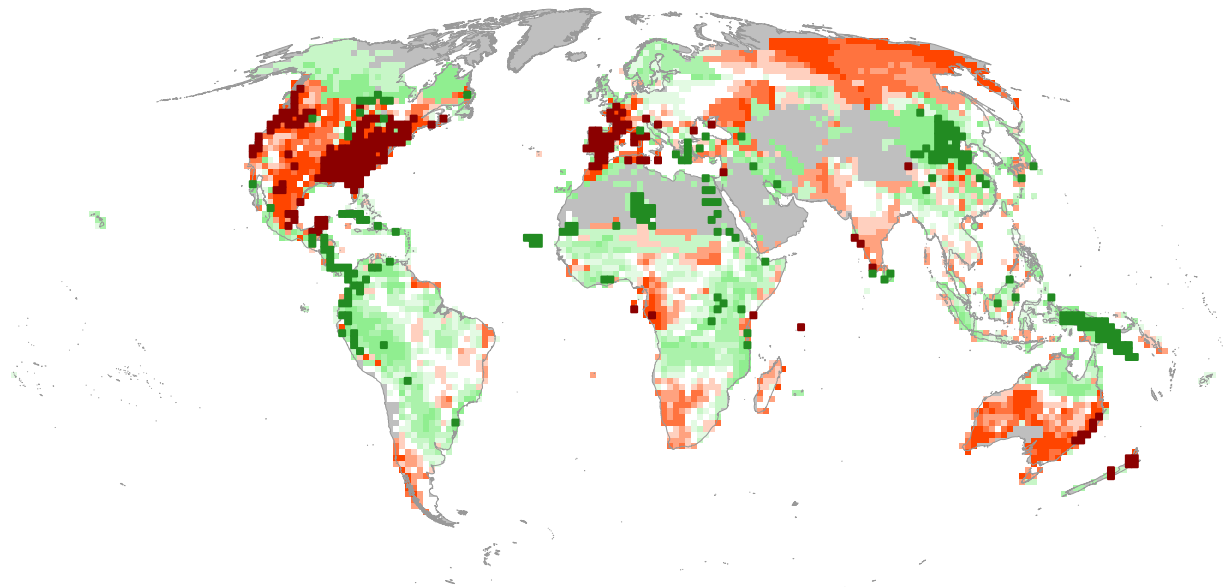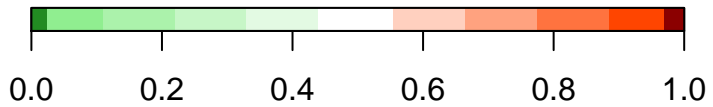

Resolution 175 X 175 km

# Amphibian EDGE dispersion

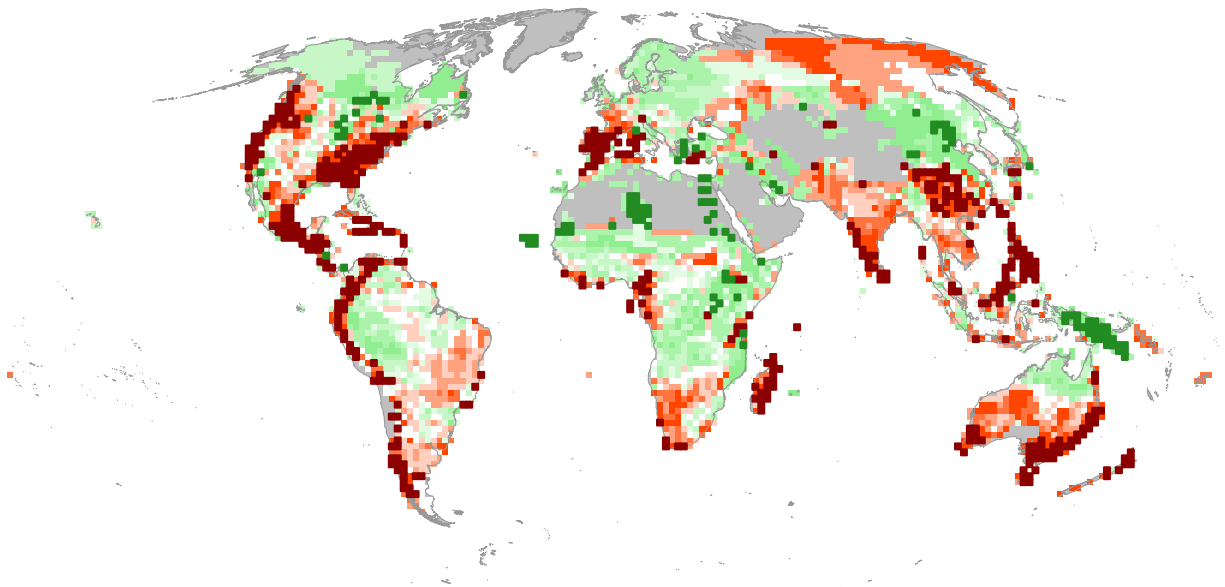

Resolution 175 X 175 km

# Amphibian ED dispersion

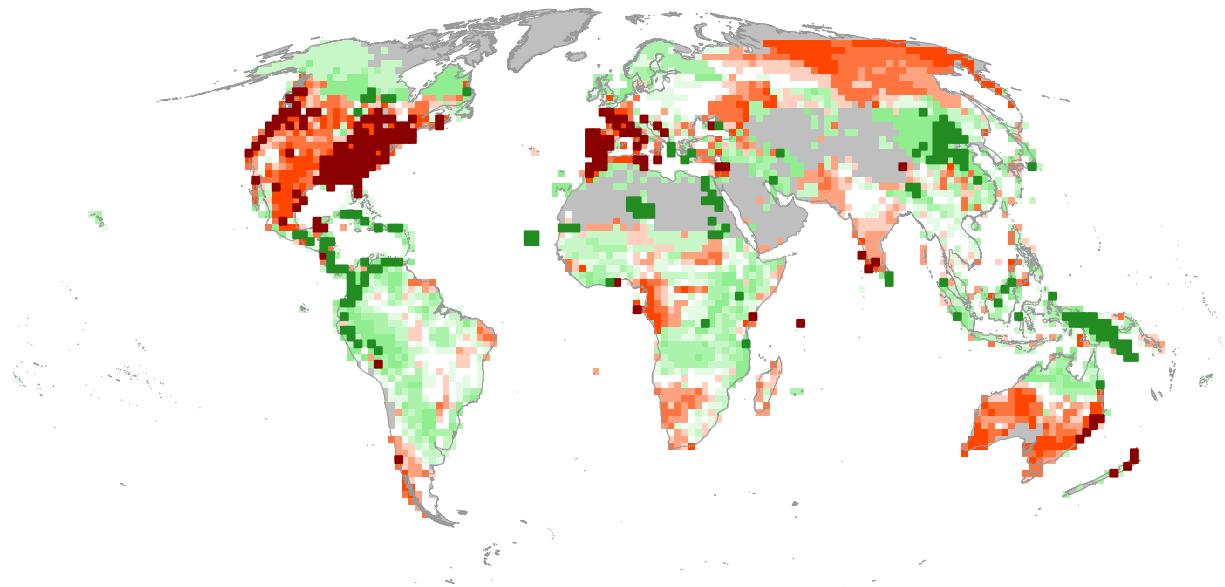

Resolution 200 X 200 km

# Amphibian EDGE dispersion

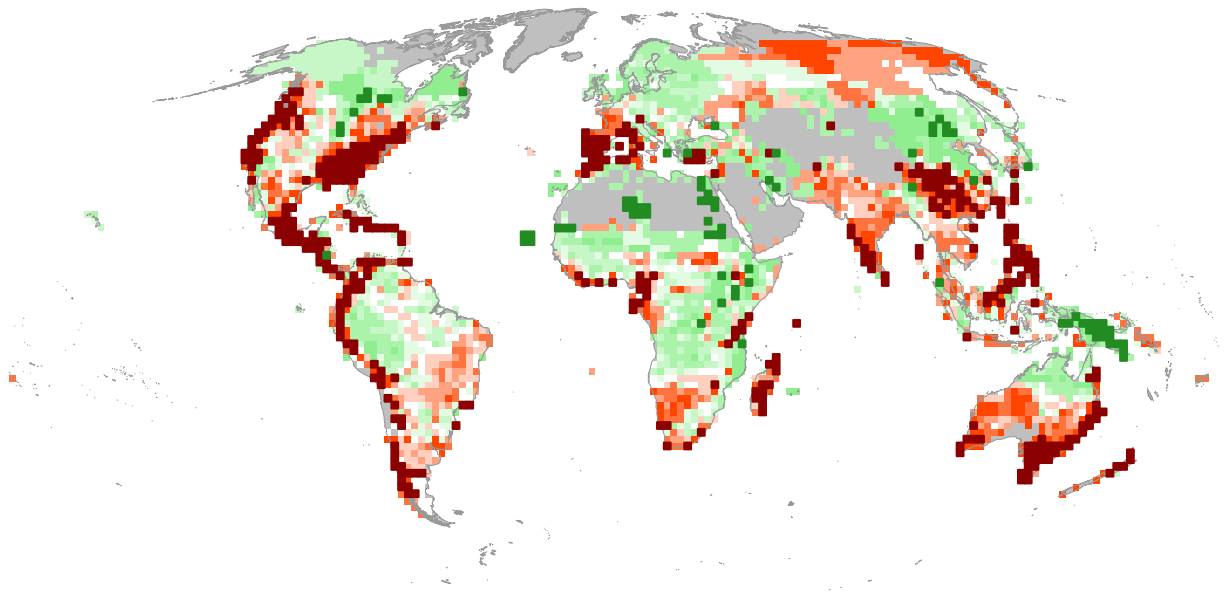

Resolution 200 X 200 km
